# Supplementary material for: Pseudoalteromone A, a Ubiquinone Derivative from Marine Pseudoalteromonas spp., Suppresses Melanogenesis
Source: MDPI journal article supplement (doi:10.3390/md19110612), 2021-10-28
Supplement: s1 [file s1]

# Pseudoalteromone A, a Ubiquinone Derivative from Marine *Pseudoalteromonas* spp., Suppresses Melanogenesis.

Su Jin Lim <sup>1,†</sup>, Daejin Min <sup>2,†</sup>, Sohee Kim <sup>3,†</sup>, Jihye Lee <sup>4,5</sup>, Eun-Soo Lee <sup>2</sup>, Hyuk Kim <sup>2</sup>, Sung Yoen Cho <sup>2</sup>, Heung Soo Beak <sup>2</sup>, Chang Seok Lee <sup>1,\*</sup>, Sang-Jip Nam <sup>4,\*</sup> and Jaeyoung Ko <sup>2,\*</sup>

<sup>1</sup> Department of Beauty and Cosmetic Science, Eulji University, Seongnam 13135, Republic of Korea; jimnote91@naver.com (S.J.L)

<sup>2</sup> Basic Research & Innovation Division Amorepacific R&D Unit, Yongin 17074, Republic of Korea; djmin@amorepacific.com (D.M.), soopian82@gmail.com (E.-S.L.), atharabia@amorepacific.com (H.K.), csy123@amorepacific.com (S.Y.C.), monmimi@amorepacific.com (H.S.B.)

<sup>3</sup> The Graduate School of Industrial Pharmaceutical Sciences, Ewha Womans University, Seoul 03760, Republic of Korea; chi0736@naver.com (S.K)

<sup>4</sup> Department of Chemistry and Nanoscience, Ewha Womans University, Seoul 03760, Republic of Korea, Korea; jl3414@gmail.com (J.L)

<sup>5</sup> Laboratories of Marine New Drugs, REDONE Seoul, Seoul 08594, Republic of Korea

\* Correspondence: cslee2010@eulji.ac.kr (C.S.L), sjnam@ewha.ac.kr (S.-J.N.), jaeyoungko@amorepacific.com (J.K.)

† These authors contributed equally to this work

## Table of Contents

|                                                                                                                                |    |
|--------------------------------------------------------------------------------------------------------------------------------|----|
| Figure S1 $^1\text{H}$ NMR spectrum (300 MHz, $\text{CD}_3\text{OD}$ ) of pseudoalteromone A ( <b>1</b> ) .....                | S3 |
| Figure S2 $^{13}\text{C}$ NMR spectrum (125 MHz, $\text{CD}_3\text{OD}$ ) of pseudoalteromone A ( <b>1</b> ) .....             | S4 |
| Table S1 Experimental (A) and reference (B) $^1\text{H}$ and $^{13}\text{C}$ NMR data of pseudoalteromone A ( <b>1</b> ) ..... | S5 |

**Figure S1**  $^1\text{H}$  NMR spectrum (400 MHz,  $\text{CD}_3\text{O D}$ ) of pseudoalteromone A (**1**)

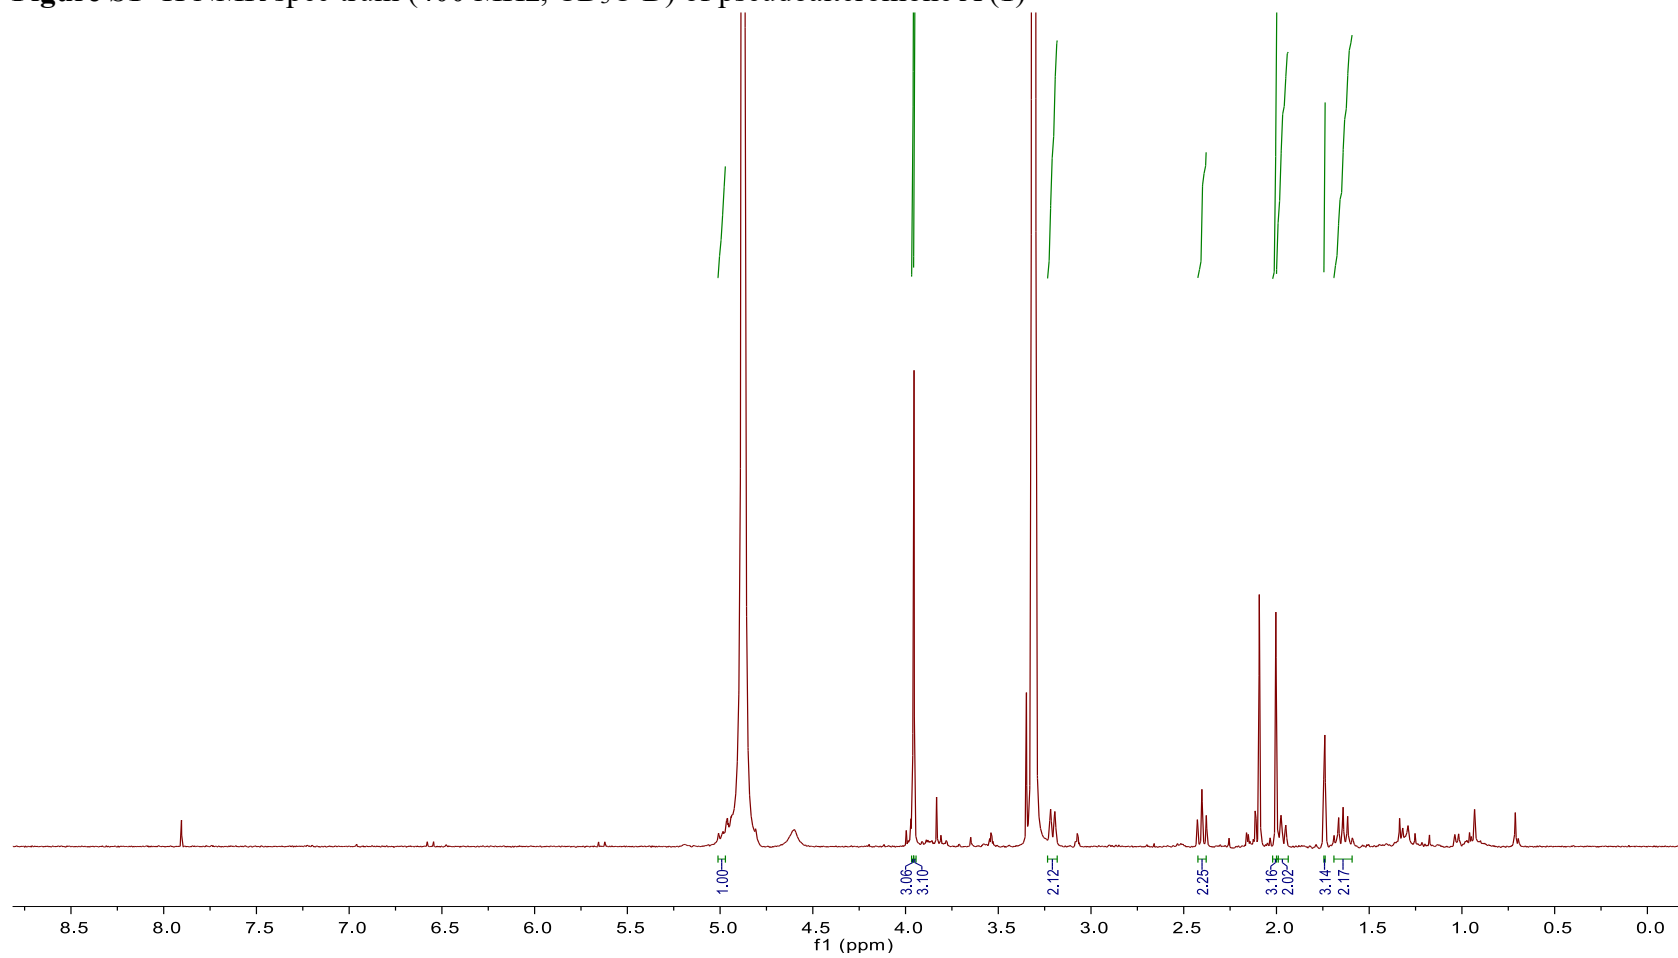

**Figure S2**  $^{13}\text{C}$  NMR spectrum (125 MHz,  $\text{CD}_3\text{OD}$ ) of pseudoalteromone A (**1**)

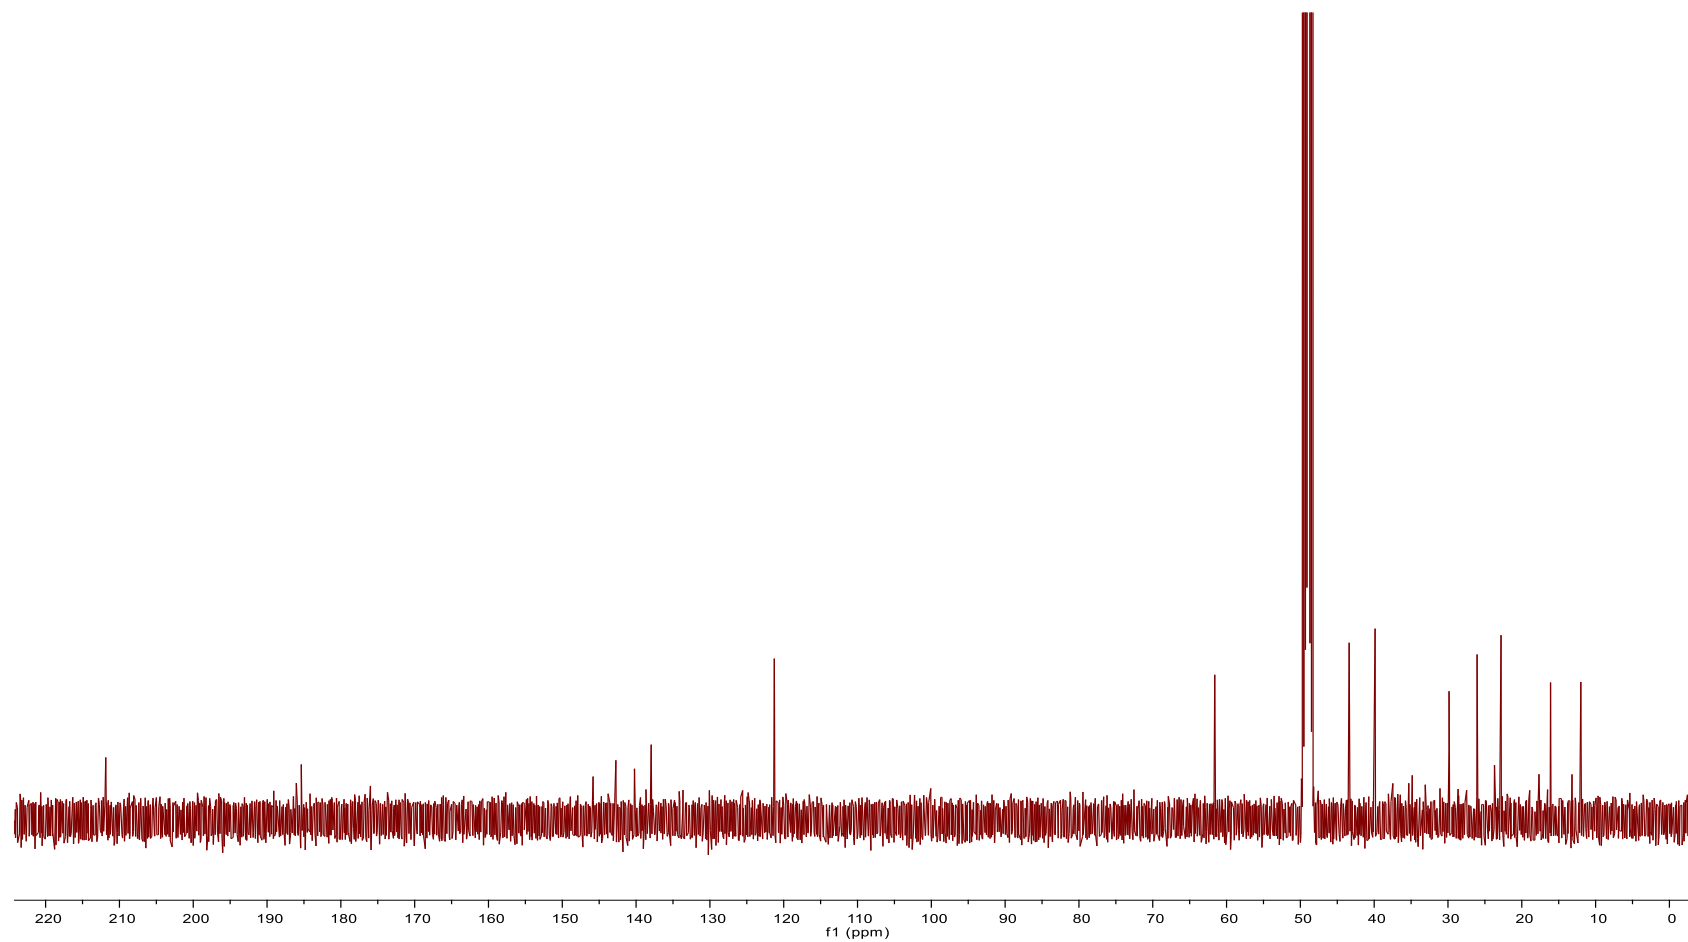

**Table S1** Experimental (A) and reference (B)  $^1\text{H}$  and  $^{13}\text{C}$  NMR data of pseudoalteromone A (**1**)

| A   |                                          |                                                     | B <sup>a</sup>                           |                                                 |
|-----|------------------------------------------|-----------------------------------------------------|------------------------------------------|-------------------------------------------------|
| No. | $\delta_{\text{C}}$ , mult. <sup>b</sup> | $\delta_{\text{H}}$ , ( $J$ in Hz)q <sup>b, c</sup> | $\delta_{\text{C}}$ , mult. <sup>d</sup> | $\delta_{\text{H}}$ , ( $J$ in Hz) <sup>d</sup> |
| 1   | 26.1, CH <sub>2</sub>                    | 3.21, d (6.8)                                       | 26.0, CH <sub>2</sub>                    | 3.19, d (6.8)                                   |
| 2   | 121.3, CH                                | 4.96, tq (6.8, 0.8)                                 | 121.3, CH                                | 4.96, m                                         |
| 3   | 138.0, qC                                |                                                     | 138.0, qC                                |                                                 |
| 4   | 39.9, CH <sub>2</sub>                    | 1.97, t (7.6)                                       | 39.9, CH <sub>2</sub>                    | 1.97, t (7.5)                                   |
| 5   | 22.8, CH <sub>2</sub>                    | 1.64, q (7.6)                                       | 22.8, CH <sub>2</sub>                    | 1.64, q (7.6)                                   |
| 6   | 43.4, CH <sub>2</sub>                    | 2.40, t (7.6)                                       | 43.5, CH <sub>2</sub>                    | 2.39, t (7.6)                                   |
| 7   | 211.9, qC                                |                                                     | 211.8, qC                                |                                                 |
| 8   | 29.9, CH <sub>3</sub>                    | 2.09, s                                             | 29.9, CH <sub>3</sub>                    | 2.09, s                                         |
| 9   | 16.1, CH <sub>3</sub>                    | 1.74, d (0.8)                                       | 16.1, CH <sub>3</sub>                    | 1.72, d (0.8)                                   |
| 1'  | 186.0, qC                                |                                                     | 186.2, qC                                |                                                 |

|        |                       |         |                       |         |
|--------|-----------------------|---------|-----------------------|---------|
| 2'     | 140.2, qC             |         | 140.3, qC             |         |
| 3'     | 142.7, qC             |         | 142.7, qC             |         |
| 4'     | 185.4, qC             |         | 185.4, qC             |         |
| 5'     | 145.8, qC             |         | 145.9, qC             |         |
| 6'     | 145.9, qC             |         | 146.1, qC             |         |
| 7'     | 12.0, CH <sub>3</sub> | 2.00, s | 12.0, CH <sub>3</sub> | 1.99, s |
| 5'-OMe | 61.5, CH <sub>3</sub> | 3.96, s | 61.6, CH <sub>3</sub> | 3.96, s |
| 6'-OMe | 61.6, CH <sub>3</sub> | 3.97, s | 61.7, CH <sub>3</sub> | 3.97, s |

---

<sup>a</sup> Reference 7: Ding, L.; He, S.; Yan, X. Efficient preparation of pseudoalteromone A f from marine *Pseudoalteromonas rubra* QD1-2 by combination of response surface methodology and high-speed counter-current chromatography: a comparison with high-performance liquid chromatography. *Mircobiol. Biotech.* 2014, 98, 4369–4377.

<sup>b</sup> 400MHz for <sup>1</sup>H NMR and 125MHz for <sup>13</sup>C NMR in CD<sub>3</sub>OD.

<sup>c</sup> Numbers of attached protons were determined by analysis of 2D spectra.

<sup>d</sup> 500MHz for <sup>1</sup>H NMR and 125MHz for <sup>13</sup>C NMR in CD<sub>3</sub>OD.
